# Supplementary material for: Subsequent CAR-T and engineered antibody for relapsed/refractory multiple myeloma following BCMA-targeted treatment: a systematic review and meta-analysis
Source: Research Square preprint supplement (doi:10.21203/rs.3.rs-8750940/v1), 2026-02-09
Supplement: Supplementary file 1 [file 9e8c7a97608fb452d83568f6.docx]

**Supplementary figures**

Figure S1 Forest plot of sensitivity analysis.

Figure S2(A) Plot of funnel;(B)Comparison of Median PFS Between CAR-T and BsAb Groups.

Figure S3 Forest plot of the adverse events rate on CAR-T and engineered antibody therapies. (A) cytokine release syndrome; (B) cytokine release syndrome (grade ≥3); (C)immune effector cell-associated neurotoxicity syndrome (ICANS) ; and (D) ICANS (grade ≥3). CAR, chimeric antigen receptor.

Figure S4 Forest plot of rate infection of grade 3 or higher on CAR-T and engineered antibody therapies. CAR, chimeric antigen receptor.

Figure S5 Forest plot of the overall response rate on commercial or not (A) CAR-T and (B) engineered antibody therapies. CAR, chimeric antigen receptor.
