# Supplementary material for: Subsequent CAR-T and engineered antibody for relapsed/refractory multiple myeloma following BCMA-targeted treatment: a systematic review and meta-analysis
Source: Research Square preprint supplement (doi:10.21203/rs.3.rs-8750940/v1), 2026-02-09
Supplement: Supplementary file 2 [file cd891c5da4d5e5950630d38d.docx]

| **Table 1** Additional characteristics of the included trials | | | | | | | | | | | | |
| --- | --- | --- | --- | --- | --- | --- | --- | --- | --- | --- | --- | --- |
| **Product** | **Target** | **Types** | **Register No.** | **Study design** | **MINOR** | **Total pts** | **ORR**，**%** | **Overall survival** | **With BCMA exposure** | | | |
| **No. of BCMA-exposed pts** | **First BCMA exposure** | **ORR, n(%)** | **PFS/OS** |
| Modakafusp Alfa | CD38 | immunocytokine | NCT03215030 | prospective | 16 | 146 | 120mg: 32 240mg: 41 | 120mg: 4.1mos 240mg: 5.3mos | 66 | CAR-T(n=21), ADC(n=32), BsAb(n=33) | 19(29) | / |
| Teclistamab | BCMA | BsAb | / | retrospective | 14 | 123 | 59 | 8.7mos | 45 | Ide-cel(n=21), ADC(n=23), both(n=1) | 22(54.8) | ide-cel exposed: 1.8mos |
| Teclistamab | BCMA | BsAb | NCT03145181 NCT04557098 | prospective | 16 | 40 | / | / | 40 | BCMA-targeted therapy | 21(52.5) | 4.5mos/15.5mos |
| Teclistamab | BCMA | BsAb | / | retrospective | 14 | 22 | / | / | 22 | BCMA-targeted therapy | 11(50) | / |
| Teclistamab | BCMA | BsAb | / | retrospective | 14 | 110 | 62 | 6-month PFS rate 52%, 6-month OS rate 80% | 38 | CAR-T(n=18), ADC(n=12), CAR-T and ADC(n=2), BsAb(n=5), ≥2 agents(n=17) | 20(53) | / |
| Teclistamab | BCMA | BsAb | / | retrospective | 14 | 22 | / | / | 22 | CAR-T(n=15), ADC(n=2), both(n=5) | 14(63) | / |
| Teclistamab | BCMA | BsAb | / | retrospective | 14 | 164 | BCMA-naive: 68 | BCMA-naive:9.7 mos/NR | 60 | CAR-T(n=41), ADC(n=22), BsAb(n=5) | 32(53) | 2.5mos/9.1mos |
| Teclistamab | BCMA | BsAb | / | retrospective | 14 | 210 | all: 67 | all:6-month PFS 53% | 84 | CAR-T(n=42), ADC(n=27), BsAb(n=6), ≥2 agents(n=17) | 49(58.3) | 6-month PFS 43% |
| BCMA-naive: 74 | BCMA-naive:6-month PFS 63% |
| Teclistamab | BCMA | BsAb | / | retrospective | 14 | 106 | 66 | 5.4mos/NR | 56 | CAR-T(n=42), ADC(n=23), ≥2 agents(n=13) | 33(59) | / |
| Teclistamab | BCMA | BsAb | / | retrospective | 14 | 33 | 46 | OS: 17.7 weeks | 20 | BCMA-targeted therapy | 7(35) | / |
| Elranatamab | BCMA | BsAb | NCT03269136 NCT04649359 NCT05014412 | retrospective | 14 | 86 | / | / | 86 | CAR-T(n=36), ADC(n=58), Both(n=8) | 39(45) | 4.8mos |
| Elranatamab | BCMA | BsAb | / | retrospective | 14 | 34 | 53 | / | 26 | BCMA-targeted therapy | 23(88) | / |
| Linvoseltamab | BCMA | BsAb | NCT03761108 | prospective | 16 | 117 | 200 mg: 71 50 mg: 48 | 200mg: NR/31.4mos | 10 | ADC | 7(70) | / |
| RO7297089 | BCMA | BsAb | NCT04434469 | prospective | 16 | 27 | 7 | / | 5 | BCMA-targeted therapy | 1(20) | / |
| Talquetamab | GPRC5D | BsAb | NCT03399799 NCT04634552 | prospective | 16 | 537 | 0.4 mg/kg:74 0.8 mg/kg:69 | 0.4 mg/kg:7.5mos/NR 0.8 mg/kg:11.2mos/NR | 78 | CAR-T(n=57), ADC(n=27), BsAb(n=11) | 52(67) | 7.7mos/12-month OS rates 74% |
| Talquetamab | GPRC5D | BsAb | / | retrospective | 14 | 68 | 71 | 4.9mos/NR | 63 | CAR-T(n=43), ADC(n=6), BsAb(n=49) | 43(68.2) | 4.8mos/NR |
| Talquetamab | GPRC5D | BsAb | / | retrospective | 14 | 55 | BCMA-naive: 68 | BCMA-naive:0.67 mos/NR | 24 | CAR-T(n=18), BsAb(n=6), both(n=12) | 17(71) | CAR-T 3.9 mos/NR BsAb 0.77 mos/NR Both 1.63 mos/NR |
| Talquetamab | GPRC5D | BsAb | / | retrospective | 14 | 138 | 65 | 6.4mos/NR | 71 | CAR-T(n=12), ADC(n=10), BsAb(n=5) | 41(58) | / |
| RG6234 | GPRC5D | BsAb | NCT04557150 | prospective | 16 | 105 | IV: 71 SC: 60 | / | 18 | BCMA-targeted therapy | 10(56) | / |
| Cevostamab | FcRH5 | BsAb | NCT03275103 | prospective | 16 | 167 | BCMA-naive: 61 | / | 96 | CAR-T(n=60), ADC(n=34), BsAb(n=40) | 29(30.2) | / |
| Cevostamab | FcRH5 | BsAb | NCT05535244 | prospective | 16 | 42 | CAR-T:73, ADC:60, BsAb:10 | / | 42 | CAR-T(n=11), ADC(n=10), BsAb(n=21) | 16(38) | / |
| Belantamab mafodotin | BCMA | ADC | / | retrospective | 14 | 82 | 43 | 3.8mos/17.2mos | 18 | CAR-T(n=12), ADC(n=1), BsAb(n=5) | 5(28) | 6mos |
| HRC0202 | BCMA | CAR-T | NCT04003168 | prospective | 16 | 7 | / | 9mos | 7 | CAR-T | 5(71.4) | 9mos |
| cilta-cel | BCMA | CAR-T | NCT04133636 | prospective | 16 | 20 | / | 9.1mos | 20 | BsAb (n=7) and ADC (n=13) | 12(60) | 9.1mos |
| ide-cel and cilta-cel | BCMA | CAR-T | / | retrospective | 14 | 36 | / | 9.6mos | 36 | BsAb | 27(75) | 9.6mos |
| HBI0101 | BCMA | CAR-T | NCT04720313 | prospective | 16 | 50 | 90 | 10.6mos | 12 | ADC | 9(75) | / |
| ide-cel | BCMA | CAR-T | NCT03361748 | prospective | 16 | 821 | 73 | 8.8mos | 123 | BCMA-targeted therapy | 71(58) | / |
| Equecabtagene Autoleucel | BCMA | CAR-T | ChiCTR2000033946 | prospective | 16 | 101 | 96 | / | 12 | CAR-T | 9(75) | 12mos PFS rate 78.8% |
| P-BCMA-ALLO1 | BCMA | CAR-T | NCT04960579 | prospective | 16 | 5 | / | / | 5 | CAR-T(n=2), BsAb(n=2), both(n=1) | 3(60) | / |
| anti-GPRC5D CAR T | GPRC5D | CAR-T | ChiCTR2100048888 | prospective | 16 | 37 | / | 4.5mos | 37 | CAR-T | 31(84) | 4.5mos |
| CC-95266 | GPRC5D | CAR-T | NCT06297226 | prospective | 16 | 84 | 87 | 14.5 mos | 38 | BCMA-targeted therapy | 30(79) | / |
| OriCAR-017 | GPRC5D | CAR-T | NCT05016778 | prospective | 16 | 10 | 100 | 11.4 mos | 5 | CAR-T | 5(100) | / |
| DM91 | GPRC5D | CAR-T | NCT05739188 | prospective | 16 | 7 | 86 | / | 3 | CAR-T | 2(67) | / |
| MCARH109 | GPRC5D | CAR-T | NCT04674813 | prospective | 16 | 17 | 71 | 150×10⁶group 7.8mos | 10 | BCMA-targeted therapy | 9(90) | / |
| CT071 | GPRC5D | CAR-T | NCT05838131 | prospective | 16 | 17 | 94 | / | 4 | CAR-T | 4(100) | / |
| No.= number. Pts= patients. ORR = overall response rate. PFS = progression-free survival. OS = overall survival. CAR = chimeric antigen receptor. BsAb = bispecific antibodies. ADC = antibody-drug conjugates. Mos=months. SC=subcutaneous. IV=intravenous. | | | | | | | | | | | | |

**Table 1 Additional characteristics of the included trials**

| **Table 2 Univariate meta-regression analysis to explore the factors that affect the overall response rate** | | | | |
| --- | --- | --- | --- | --- |
| Variables | Coefficient | SE | 95% CI | P |
| commercial CAR-T | 0.444 | 0.253 | (0.949-2.562) | 0.08 |
| GPRC5D CAR-T | 1.517 | 0.332 | (2.378-8.746) | **<0.001** |
| BCMA CAR-T | 0.747 | 0.489 | (0.809-5.509) | 0.127 |
| Cevostamab | -0.802 | 0.278 | (0.260-0.773) | **0.004** |
| Talquetamab | 0.486 | 0.224 | (1.048-2.522) | **0.03** |
| Extramedullary disease | -0.021 | 0.013 | (0.954-1.005) | 0.114 |
| High-risk cytogenetic profile | 0.002 | 0.046 | (0.916-1.096) | 0.965 |
| R-ISS stage III | -0.044 | 0.073 | (0.830-1.103) | 0.543 |
| Median age (years) | -0.088 | 0.073 | (0.794-1.057) | 0.228 |
| Median prior lines of therapy | -0.258 | 0.223 | (0.499-1.195) | 0.246 |
| Penta refractory MM | -0.021 | 0.023 | (0.936-1.023) | 0.343 |
| CAR= chimeric antigen receptor. R-ISS = The Revised International Staging System. MM = multiple myeloma. SE=standard error. CI=confidence interval. | | | | |

**Table 2: Univariate meta-regression analysis to explore the factors that affect the overall response rate.**
